# Supplementary material
Source: PubMed Central journal article supplement (PMC3497170)
Supplement: AAC.01494-12_zac999101421so1.pdf [file AAC.01494-12_zac999101421so1.pdf]

TABLE S1. Genetic organization of ICESp1116

| BLASTP analysis <sup>c</sup> |               |              |                           |                                                    |                                                                                                       |                |                                    |  |
|------------------------------|---------------|--------------|---------------------------|----------------------------------------------------|-------------------------------------------------------------------------------------------------------|----------------|------------------------------------|--|
| ORF <sup>a</sup>             | Start<br>(bp) | Stop<br>(bp) | No.<br>of aa <sup>b</sup> | Predicted function                                 | Most significant database match                                                                       | Accession no.  | % aa identity<br>(% aa similarity) |  |
| orf1                         | 116           | 277          | 53                        |                                                    | hypothetical protein Gallo_0260 [ <i>Streptococcus gallolyticus</i> UCN34]                            | YP_003429700.1 | 62 (79)                            |  |
| orf2                         | 280           | 1194         | 304                       | Replication initiator protein A                    | replication initiation protein Rep [ <i>Streptococcus infantarius</i> subsp. <i>infantarius</i> CJ18] | AEZ63101.1     | 61 (74)                            |  |
| orf3                         | 1181          | 1345         | 54                        |                                                    | hypothetical protein STRINF_00903 [ <i>S. infantarius</i> subsp. <i>infantarius</i> ATCC BAA-102]     | ZP_02920028.1  | 81 (87)                            |  |
| orf4                         | 1535          | 1909         | 124                       |                                                    | hypothetical protein STRINF_00904 [ <i>S. infantarius</i> subsp. <i>infantarius</i> ATCC BAA-102]     | ZP_02920029.1  | 64 (79)                            |  |
| orf5                         | 1920          | 2729         | 269                       |                                                    | unnamed protein product [ <i>Streptococcus macedonicus</i> ACA-DC 198]                                | YP_005095590.1 | 99 (99)                            |  |
| orf6                         | 2753          | 6148         | 1131                      | Adhesin isopeptide-forming domain,<br>sspB-C2 type | unnamed protein product [ <i>S. macedonicus</i> ACA-DC 198]                                           | YP_005095589.1 | 96 (98)                            |  |
| orf7                         | 6289          | 9651         | 1120                      | Peptidase family C39                               | unnamed protein product [ <i>S. macedonicus</i> ACA-DC 198]                                           | YP_005095588.1 | 92 (94)                            |  |
| orf8                         | 9843          | 10070        | 75                        |                                                    | unnamed protein product [ <i>S. macedonicus</i> ACA-DC 198]                                           | YP_005095587.1 | 99 (100)                           |  |
| orf9                         | 10118         | 10693        | 191                       |                                                    | unnamed protein product [ <i>S. macedonicus</i> ACA-DC 198]                                           | YP_005095586.1 | 88 (97)                            |  |
| orf10                        | 10745         | 11497        | 250                       |                                                    | hypothetical protein Gallo_0275 [ <i>S. gallolyticus</i> UCN34]                                       | YP_003429715.1 | 94 (99)                            |  |
| orf11                        | 11507         | 11968        | 153                       | Transcriptional regulator                          | putative transcriptional regulator [ <i>S. infantarius</i> subsp. <i>infantarius</i> CJ18]            | AEZ63093.1     | 77 (82)                            |  |
| orf12                        | 12076         | 12432        | 118                       |                                                    | hypothetical protein Sinf_1801 [ <i>S. infantarius</i> subsp. <i>infantarius</i> CJ18]                | AEZ63092.1     | 98 (99)                            |  |
| orf13                        | 12377         | 14767        | 796                       | Type IV secretory pathway,<br>VirB4 components     | unnamed protein product [ <i>S. macedonicus</i> ACA-DC 198]                                           | YP_005095583.1 | 99 (99)                            |  |
| orf14                        | 14804         | 17467        | 887                       | CHAP domain protein                                | surface antigen [ <i>S. infantarius</i> subsp. <i>infantarius</i> CJ18]                               | AEZ63090.1     | 97 (99)                            |  |
| orf15                        | 17483         | 18088        | 201                       |                                                    | unnamed protein product [ <i>S. macedonicus</i> ACA-DC 198]                                           | YP_005095586.1 | 95 (97)                            |  |

|    |        |       |       |      |                                       |                                                                                                     |                |           |
|----|--------|-------|-------|------|---------------------------------------|-----------------------------------------------------------------------------------------------------|----------------|-----------|
| 1  | orf16  | 18101 | 18487 | 128  | Single-strand DNA-binding protein     | hypothetical protein STRINF_00915 [ <i>S. infantarius</i> subsp. <i>infantarius</i> ATCC BAA-102]   | ZP_02920040.1  | 95 (97)   |
| 2  |        |       |       |      |                                       |                                                                                                     |                |           |
| 3  | orf17  | 18509 | 18784 | 91   |                                       | unnamed protein product [ <i>S. macedonicus</i> ACA-DC 198]                                         | YP_005095578.1 | 91 (97)   |
| 4  | orf18  | 18784 | 19578 | 264  |                                       | hypothetical protein Sinf_1795 [ <i>S. infantarius</i> subsp. <i>infantarius</i> CJ18]              | AEZ63086.1     | 88 (93)   |
| 5  | orf19  | 19590 | 20057 | 155  |                                       | hypothetical protein STRINF_00919 [ <i>S. infantarius</i> subsp. <i>infantarius</i> ATCC BAA-102]   | ZP_02920044.1  | 93 (96)   |
| 6  |        |       |       |      |                                       |                                                                                                     |                |           |
| 7  | orf20  | 20079 | 22148 | 689  | TraG family protein                   | TraG family protein [ <i>Streptococcus agalactiae</i> ATCC 13813]                                   | EFV96646.1     | 97 (98)   |
| 8  | orf21  | 22184 | 22327 | 47   |                                       | hypothetical protein SGPB_1240 [ <i>Streptococcus pasteurianus</i> ATCC 43144]                      | YP_004559376.1 | 91 (94)   |
| 9  | orf22  | 22376 | 22870 | 164  | Transcriptional regulator             | XRE family transcriptional regulator [ <i>Streptococcus sanguinis</i> ATCC 49296]                   | ZP_07887379.1  | 49 (66)   |
| 10 | orf23* | 22883 | 24664 | 593  | DNA topoisomerase                     | topB gene product [ <i>S. macedonicus</i> ACA-DC 198]                                               | YP_005095572.1 | 97 (99)   |
| 11 | orf24  | 24680 | 29344 | 1554 | Topoisomerase-primase, domain protein | hypothetical protein Sinf_1789 [ <i>S. infantarius</i> subsp. <i>infantarius</i> CJ18]              | AEZ63080.1     | 91 (95)   |
| 12 |        |       |       |      |                                       |                                                                                                     |                |           |
| 13 | orf25  | 29402 | 29689 | 95   |                                       | hypothetical protein, transposon associated [ <i>S. infantarius</i> subsp. <i>infantarius</i> CJ18] | AEZ63079.1     | 89 (96)   |
| 14 |        |       |       |      |                                       |                                                                                                     |                |           |
| 15 | orf26  | 30011 | 30385 | 124  |                                       | mobilization protein [ <i>S. infantarius</i> subsp. <i>infantarius</i> CJ18]                        | AEZ63078.1     | 100 (100) |
| 16 | orf27  | 30357 | 31985 | 542  | Relaxase                              | relaxase [ <i>S. infantarius</i> subsp. <i>infantarius</i> CJ18]                                    | AEZ63077.1     | 98 (99)   |
| 17 | orf28  | 32021 | 32818 | 265  |                                       | unnamed protein product [ <i>S. macedonicus</i> ACA-DC 198]                                         | YP_005095566.1 | 78 (83)   |
| 18 | orf29  | 32927 | 33097 | 56   |                                       | pSM19305 ORF alpha [ <i>Streptococcus pyogenes</i> ]                                                | YP_232753.1    | 96 (100)  |
| 19 | orf30  | 33111 | 33728 | 205  | Site-specific recombinase             | pSM19305 site-specific recombinase ORF beta [ <i>S. pyogenes</i> ]                                  | YP_232754.1    | 99 (99)   |
| 20 | orf31  | 33728 | 35827 | 699  | DNA topoisomerase                     | pSM19305 DNA topoisomerase ORF gamma [ <i>S. pyogenes</i> ]                                         | YP_232755.1    | 99 (99)   |
| 21 | orf32  | 35975 | 36872 | 298  | ParA protein                          | pSM19305 hypothetical protein ORF delta [ <i>S. pyogenes</i> ]                                      | YP_232756.1    | 100 (100) |
| 22 | orf33* | 36963 | 37178 | 71   | Omega transcriptional repressor       | pSM19305 transcriptional repressor ORF omega [ <i>S. pyogenes</i> ]                                 | YP_232757.1    | 99 (100)  |
| 23 | orf34  | 37195 | 37467 | 90   | Bacterial epsilon antitoxin protein   | pSM19035 antidote of epsilon-zeta postsegregational killing system [ <i>S. pyogenes</i> ]           | YP_232758.1    | 100 (100) |
| 24 | orf35  | 37469 | 38332 | 287  | Bacterial zeta toxin protein          | pSM19035 toxin of epsilon-zeta postsegregational killing system [ <i>S. pyogenes</i> ]              | YP_232759.1    | 99 (99)   |
| 25 | erm(B) | 39330 | 38593 | 245  | rRNA methylase                        | ribosomal RNA adenine dimethylase [ <i>Enterococcus faecalis</i> DS5]                               | ZP_05563514.1  | 100 (100) |
| 26 | orf37  | 39538 | 39455 | 27   | rRNA methylase leader peptide         | leader peptide [ <i>S. pyogenes</i> ]                                                               | YP_232760.1    | 100 (100) |

|   |                            |       |       |     |                                                 |                                                                               |                |           |
|---|----------------------------|-------|-------|-----|-------------------------------------------------|-------------------------------------------------------------------------------|----------------|-----------|
| 1 | <i>orf38</i>               | 40352 | 39666 | 228 | IS1216 transposase                              | IS1216 transposase [ <i>Enterococcus faecalis</i> V583]                       | NP_816937.1    | 99 (100)  |
| 2 | <i>tet(M)</i> <sup>d</sup> | 40421 | 41026 | 517 | Tetracycline-resistance protein                 | tetracycline resistance protein [ <i>Enterococcus gallinarum</i> EG2]         | ZP_05648443.1  | 95 (96)   |
| 3 | <i>orf40</i> *             | 42124 | 42261 | 45  |                                                 | conjugative transposon protein [ <i>Clostridium difficile</i> 630]            | YP_001086984.1 | 98 (100)  |
| 4 | <i>orf41</i>               | 42673 | 42314 | 119 | Transcriptional regulator                       | putative conjugative transposon regulatory protein [ <i>C. difficile</i> 630] | YP_001086985.1 | 100 (100) |
| 5 | <i>orf42</i>               | 43175 | 43600 | 141 | RNA polymerase sigma-70 region 4 family protein | putative conjugative transposon regulatory protein [ <i>C. difficile</i> 630] | YP_001086987.1 | 100 (100) |
| 6 |                            |       |       |     |                                                 |                                                                               |                |           |
| 7 | <i>orf43</i>               | 43597 | 43827 | 76  |                                                 | conjugative transposon protein [ <i>C. difficile</i> 630]                     | YP_001086988.1 | 100 (100) |
| 8 | <i>orf44</i>               | 44404 | 46035 | 543 | Site-specific recombinase                       | conjugative transposon site-specific recombinase [ <i>C. difficile</i> 630]   | YP_001086990.1 | 99 (99)   |
| 9 | <i>orf45</i>               | 46512 | 47864 | 450 |                                                 | hypothetical protein [ <i>S. agalactiae</i> ATCC 13813]                       | EFV96631.1     | 97 (99)   |

10

11 <sup>a</sup> Asterisks indicate ORFs with unusual start codons, i.e. start codons other than ATG (GTG in *orf23* and *orf33*; and TTG in *orf40*).

12 <sup>b</sup> aa, amino acid(s).

13 <sup>c</sup> For each ORF, only the most significant homology detected is reported.

14 <sup>d</sup> Truncated *tet(M)* gene.

15

16
